# Supplementary material for: Immunobiotic Feed Developed with Lactobacillus delbrueckii subsp. delbrueckii TUA4408L and the Soymilk By-Product Okara Improves Health and Growth Performance in Pigs
Source: MDPI journal article supplement (doi:10.3390/microorganisms9050921), 2021-04-25
Supplement: s1 [file s1]

**Supplementary Table S1.** Nutritional composition of diets administered to piglets.

| Nutrient (%)                      | After weaning<br>to 30 kg | From 30 kg to<br>70 kg | From 70 kg to<br>120 kg |
|-----------------------------------|---------------------------|------------------------|-------------------------|
| <b>Protein</b>                    | More than 18.0            | More than 15.0         | More than 14.0          |
| <b>Fat</b>                        | More than 3.5             | More than 4.0          | More than 2.5           |
| <b>Fiber</b>                      | Less than 4.0             | Less than 6.0          | Less than 5.0           |
| <b>Mineral</b>                    | Less than 8.0             | Less than 8.0          | Less than 8.0           |
| <b>Calcium</b>                    | More than 0.75            | More than 0.5          | More than 0.5           |
| <b>Phosphorus</b>                 | More than 0.60            | More than 0.4          | More than 0.4           |
| <b>Total digestible nutrients</b> | More than 80.0            | More than 78.0         | More than 77.0          |
